# Supplementary material for: The Role of the N-Domain in the ATPase Activity of the Mammalian AAA ATPase p97/VCP
Source: PubMed Central journal article supplement — J Biol Chem. 2012 Jan 23;287(11):8561–70. doi: 10.1074/jbc.M111.302778 (PMC3318706; doi:10.1074/jbc.m111.302778), 2012-01-23
Supplement: supp_M111.302778_jbc.M111.302778-1.pdf [file supp_M111.302778_jbc.M111.302778-1.pdf]

## **SUPPLEMENTAL DATA**

### **ATPase assay based on malachite green system**

ATPase assays were performed using malachite green system (19,54) to obtain kinetic parameters. The assays were performed in reaction mixture containing 50 mM Tris-HCl (pH 8.0), 20 mM MgCl<sub>2</sub>, 1 mM EDTA, 0.1-3 mM ATP and 0.5 μM p97. To start the reaction, ATP was added to 50 μl of reaction mixture, the reaction was carried out at 37 °C for 15 min. Malachite green dye buffer of 400 μl containing 6 mM ammonium heptamolybdate, 120 μM malachite green, 0.06% polyvinyl alcohol, and 3.4% sodium citrate was added. Incubation at room temperature for 20 min is required for colour development, then 200 μl from each reaction was transferred to a 96-well plate for measurement of absorbance at 630 nm. Reactions containing no p97 were performed to generate a background readings of inorganic phosphate and were subtracted from the experimental results. The inorganic phosphate released was calculated based on the absorbance standard curve established by KH<sub>2</sub>PO<sub>4</sub> standards. The kinetic parameters  $K_M$  and  $k_{cat}$  were calculated from the Lineweaver-Burk plot. All assays were repeated at least three times.

### **Circular Dichroism**

Samples of wild type and mutant p97 at 0.1mg/ml in CD buffer (20mM phosphate, 150mM potassium chloride, 5mM magnesium chloride) were run on a Chirascan spectropolarimeter (Applied Photophysics) in a 0.1cm quartz cuvette.

### **Dynamic Light Scattering**

Wild-type and mutant p97 samples at ~1mg/ml and in 250 mM KCl, 2 mM β-ME, 25 mM HEPES pH 7.5 were measured on a Zetasizer nano-series (Malvern instruments).

| Mutation          | $k_{cat}$ (nmol ATP/min/ $\mu$ g p97) | $K_M$ (mM) | $k_{cat}/K_M$ (nmol ATP/min/ $\mu$ g p97/mM ATP) |
|-------------------|---------------------------------------|------------|--------------------------------------------------|
| Wild-type         | 0.36                                  | 0.36       | 1.00                                             |
| A232E             | 0.45                                  | 0.42       | 1.06                                             |
| R155C/N387C       | 0.06                                  | 0.88       | 0.07                                             |
| R155C/N387C (DTT) | 0.24                                  | 0.16       | 1.52                                             |

**Table S1:** Michaelis-Menton measurements for wild-type p97, p97<sup>A232E</sup> and p97<sup>R159C/N387C</sup>. Parameters for p97<sup>R159C/N387C</sup> were calculated both in the presence and absence of DTT.

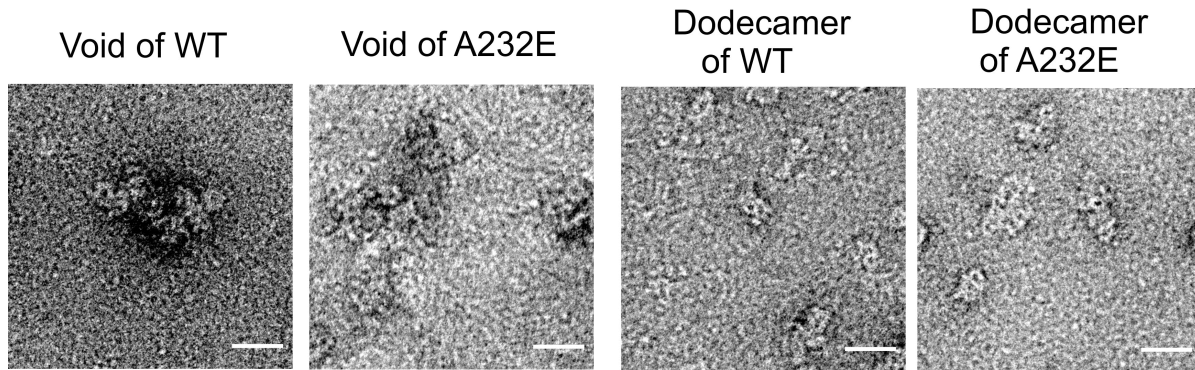

**Figure S1:** Negative-stain electron microscopy of wild-type p97 and p97<sup>A232E</sup> fractions. Micrographs of the void volume and dodecamer fractions from the gel filtration of wild-type p97 and p97<sup>A232E</sup> in a superose6 (GE healthcare). The scale bar represents 300Å. The void fractions show large aggregated clumps for both wild-type p97 and p97<sup>A232E</sup>.

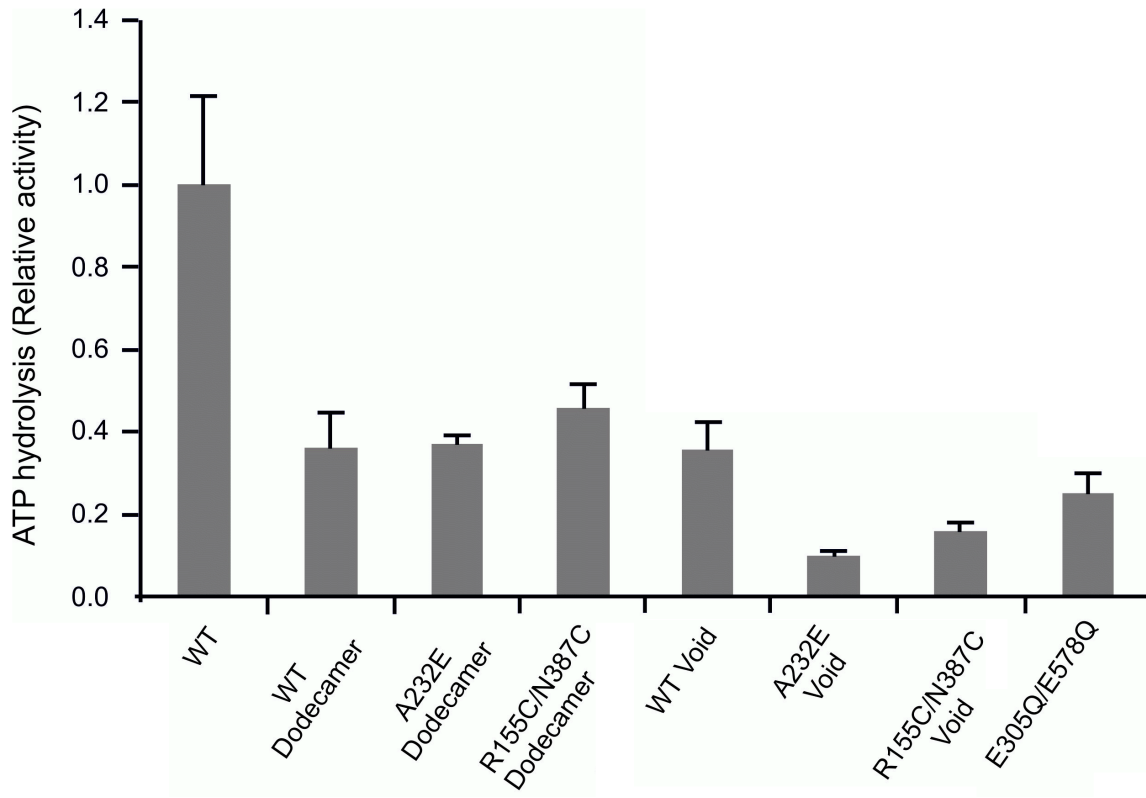

**Figure S2:** ATPase activities of the void volume and dodecamer fractions from size exclusion chromatography. Fractions containing wild-type p97, p97<sup>A232E</sup> and p97<sup>R155C/N387C</sup> were obtained using a superose6 column (GE healthcare). The histogram shows the rates of ATP hydrolysis averaged from three independent measurements and normalised against wild-type. Error bars indicate standard deviations.

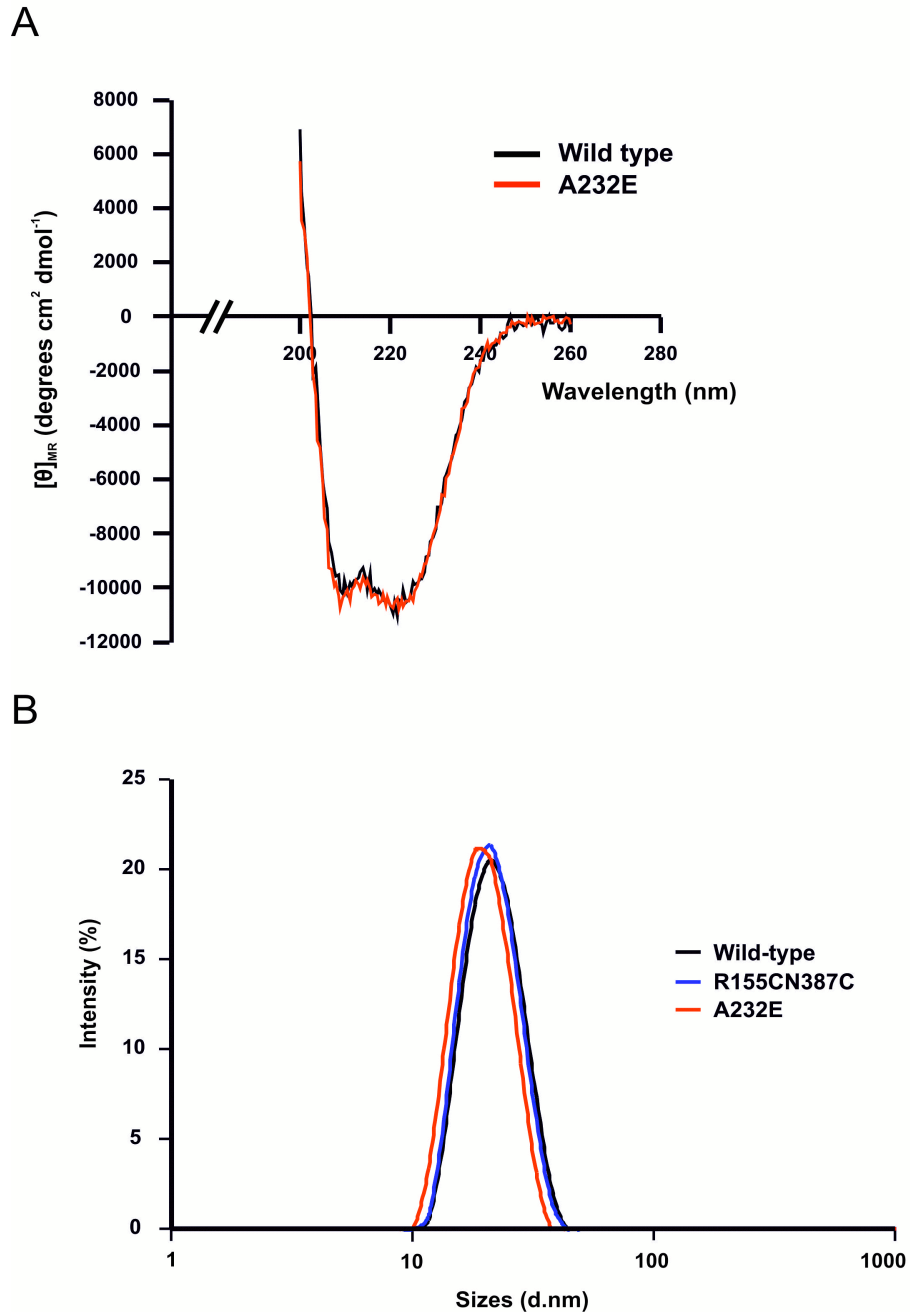

**Figure S3:** Circular dichroism and dynamic light scattering of wild-type and p97 mutants. A. Spectra for wild-type p97 and p97<sup>A232E</sup> between wavelengths 200 and 260nm are plotted against mean residue ellipticity (degrees  $\text{cm}^2 \text{dmol}^{-1}$ ). B. Dynamic light scattering for wild-type p97, p97<sup>A232E</sup> and p97<sup>R155CN387C</sup>. Representative average particle sizes in solution of wild type p97, p97<sup>R155CN387C</sup> and p97<sup>A232E</sup> show similar distributions.

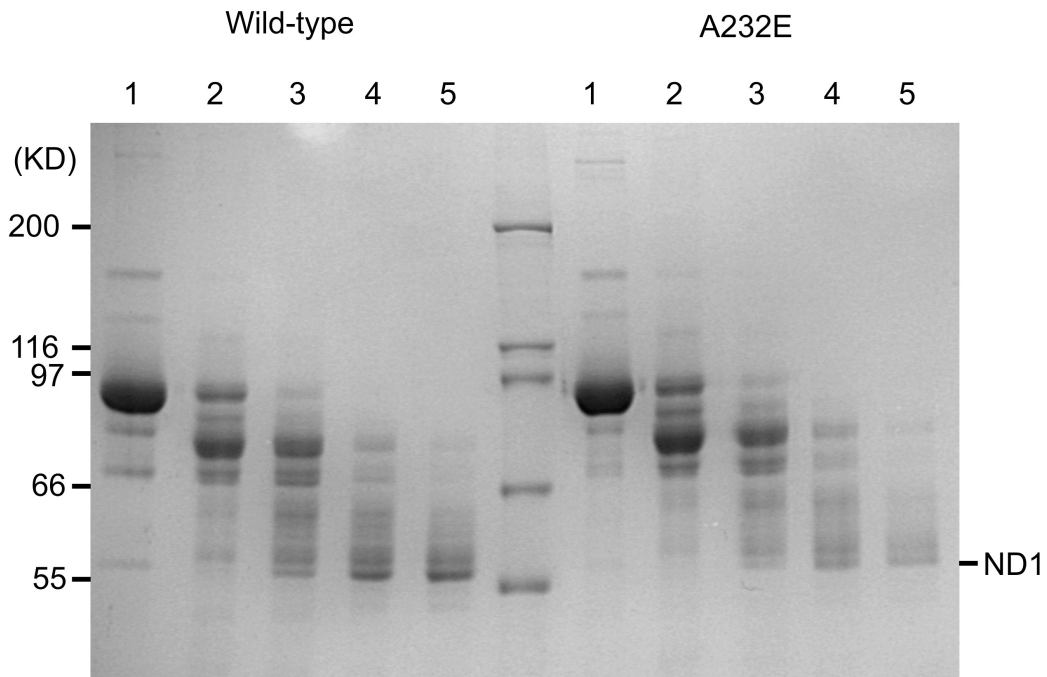

**Figure S4:** Limited proteolysis for wild-type p97 and p97<sup>A232E</sup>. Reactions were analyzed by SDS-PAGE with lanes 1 to 5 showing p97 samples incubated with trypsin for 0, 10, 20, 30, and 40 min respectively. The band corresponding to the N-D1 p97 fragment (labeled), as confirmed by N-terminal peptide sequencing, is more stable in wild-type p97 than p97<sup>A232E</sup>.
